# Supplementary material for: Nanomorphology-dependent pseudocapacitive properties of NiO electrodes engineered through a controlled potentiodynamic electrodeposition process
Source: Royal Society of Chemistry journal article supplement (doi:10.1039/c5ra26041h), 2016-01-01
Supplement: c5ra26041h1.pdf [file c5ra26041h1.pdf]

## Electronic Supporting Information

### Nanomorphology-dependent pseudocapacitive properties of NiO electrodes engineered through controlled potentiodynamic electrodeposition process

Rohan M. Kore, Rajaram S. Mane, Mu. Naushad, Mohammad R. Khan and Balkrishna J. Lokhande

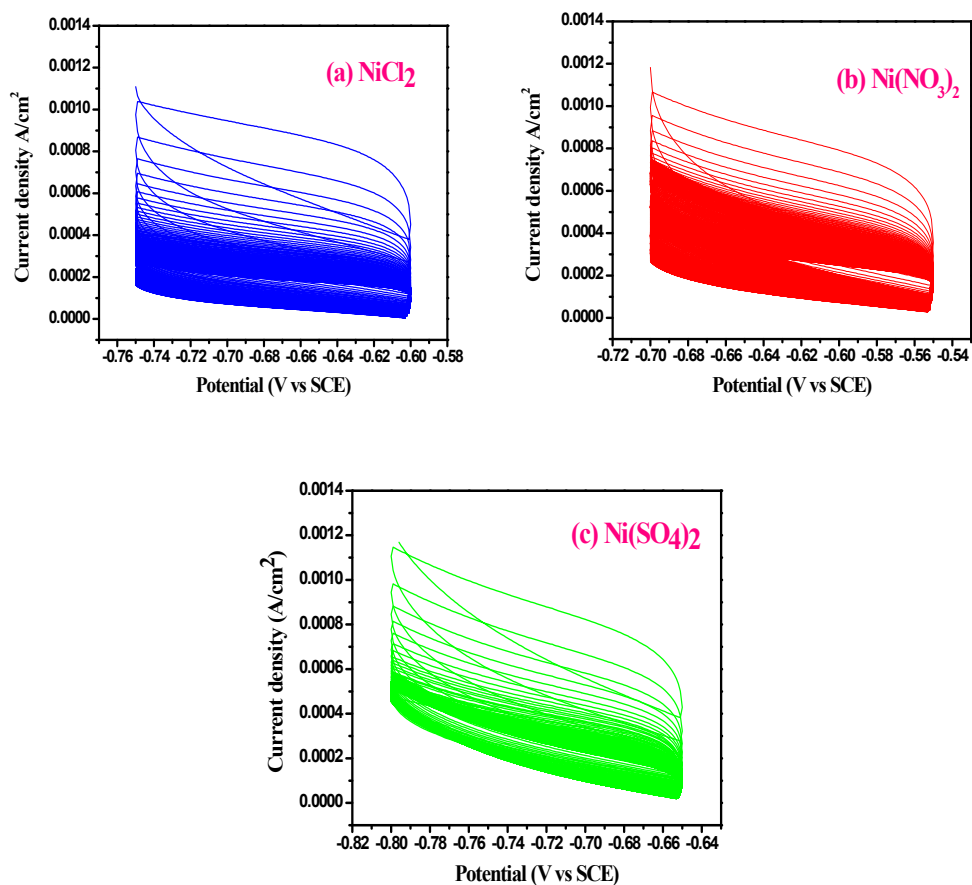

**Figure S1:** Cyclic voltammetry curves at 100 mV.s<sup>-1</sup> for 30 minutes during the potentiodynamic electrodeposition for different precursors (a) Nickel chloride (NiCl<sub>2</sub>·6H<sub>2</sub>O), (b) Nickel nitrate (Ni(NO<sub>3</sub>)<sub>2</sub>) and (c) Nickel sulphate (Ni(SO<sub>4</sub>)<sub>2</sub>).

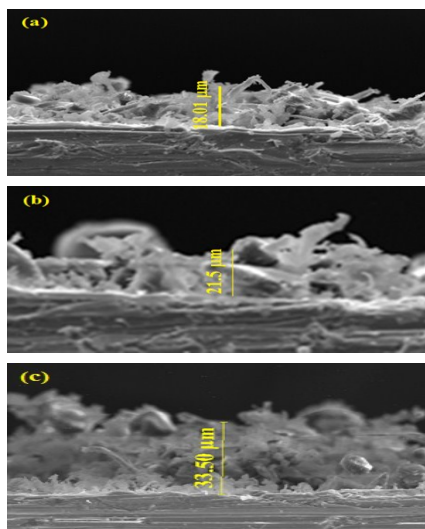

**Figure S2:** Cross sectional SEM images of (a) NiO-C, (b) NiO-N and (c) NiO-S samples.

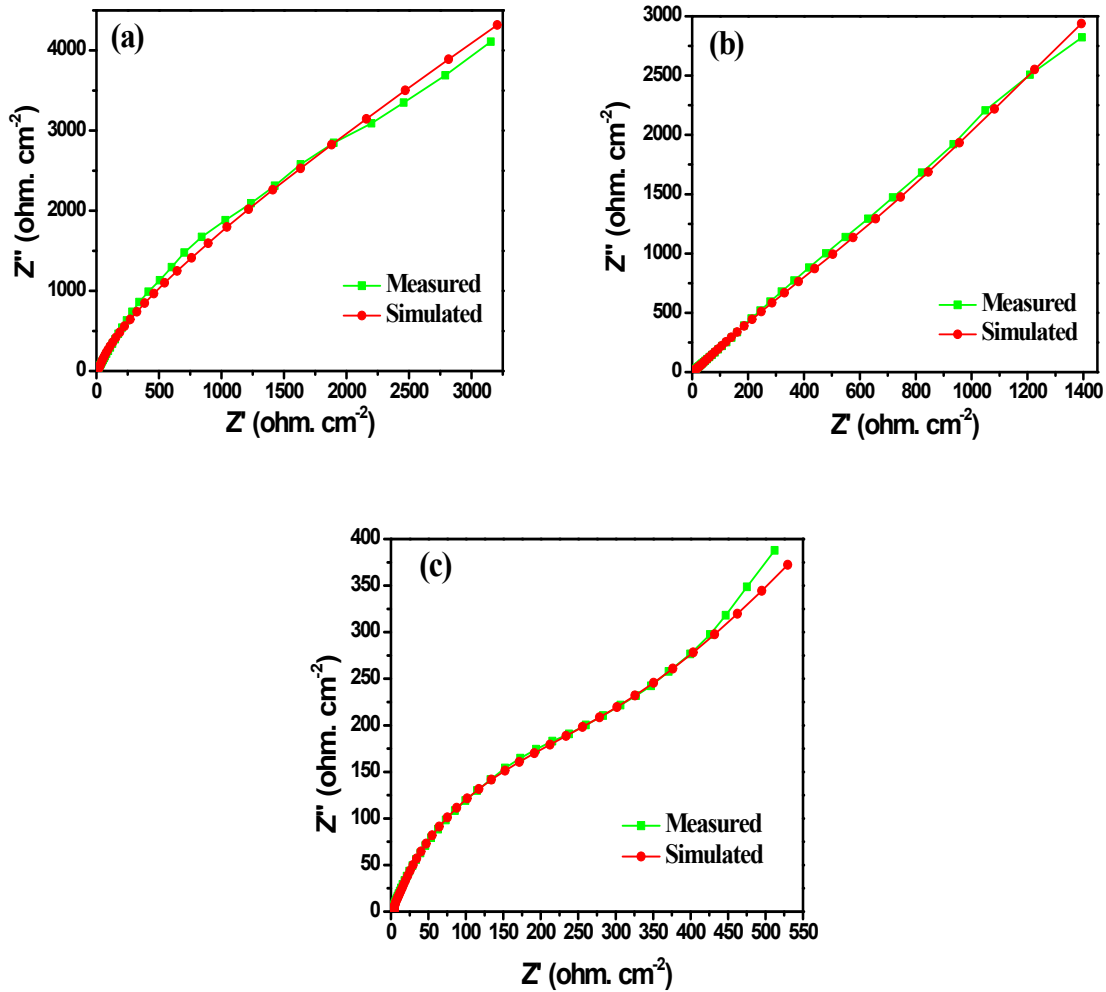

**Figure S3:** The measured and simulated data for matched equivalent circuit for (a) NiO-N, (b) NiO-C and (c) NiO-S electrodes, which indicates a very good agreement between measured and simulated data for matched equivalent circuit.

**Table S1:** Electrochemical circuitry parameters obtained from EIS study for matched equivalent circuit.

| Parameters                | Electrode Type |          |          |
|---------------------------|----------------|----------|----------|
|                           | NiO-N          | NiO-C    | NiO-S    |
| $R_s(\Omega/\text{cm}^2)$ | 1.34           | 1.29     | 1.27     |
| $R_1(\Omega/\text{cm}^2)$ | 21.11          | 10.17    | 4.35     |
| $R_2(\Omega/\text{cm}^2)$ | 0.28           | 0.21     | 0.10     |
| $R_3(\Omega/\text{cm}^2)$ | 0.001          | 0.001    | 0.001    |
| CPE-1( $\mu\text{F}$ )    | 0.227          | 0.349    | 0.455    |
| CPE-2( $\mu\text{F}$ )    | 0.3427         | 0.533    | 0.841    |
| Q                         | 0.000158       | 0.000258 | 0.000961 |
| W                         | 0.000144       | 0.000207 | 0.000145 |
